# Supplementary material for: Synthesis of ordered meso/macroporous H3PW12O40/SiO2 and its catalytic performance in oxidative desulfurization
Source: Royal Society of Chemistry journal article supplement (doi:10.1039/c6ra09154g), 2016-01-01
Supplement: c6ra09154g1.pdf [file c6ra09154g1.pdf]

## Supplementary Information

### **Synthesis of ordered meso/macroporous H<sub>3</sub>PW<sub>12</sub>O<sub>40</sub>/SiO<sub>2</sub> and its catalytic performance in oxidative desulfurization**

Peng Yang <sup>a</sup>, Shiyu Zhou <sup>b</sup>, Yue Du <sup>b</sup>, Junsheng Li <sup>b</sup>, Jiaheng Lei <sup>b\*</sup>

<sup>a</sup> School of Materials Science and Engineering, Wuhan University of Technology, Wuhan, Hubei, 430070, P.R. China

<sup>b</sup> Department of Chemistry, Wuhan University of Technology, Wuhan, Hubei, 430070, P.R. China.

Author information

First author: E-mail: yp\_03@163.com

\*Corresponding author: E-mail: 2187@whut.edu.cn

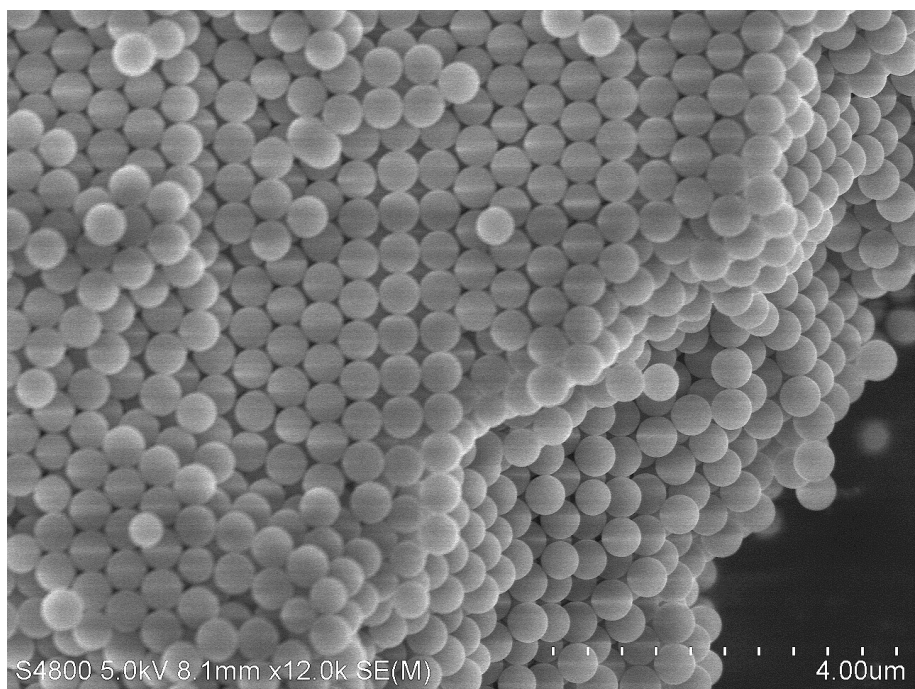

Fig. S1 SEM image of polystyrene colloidal crystals

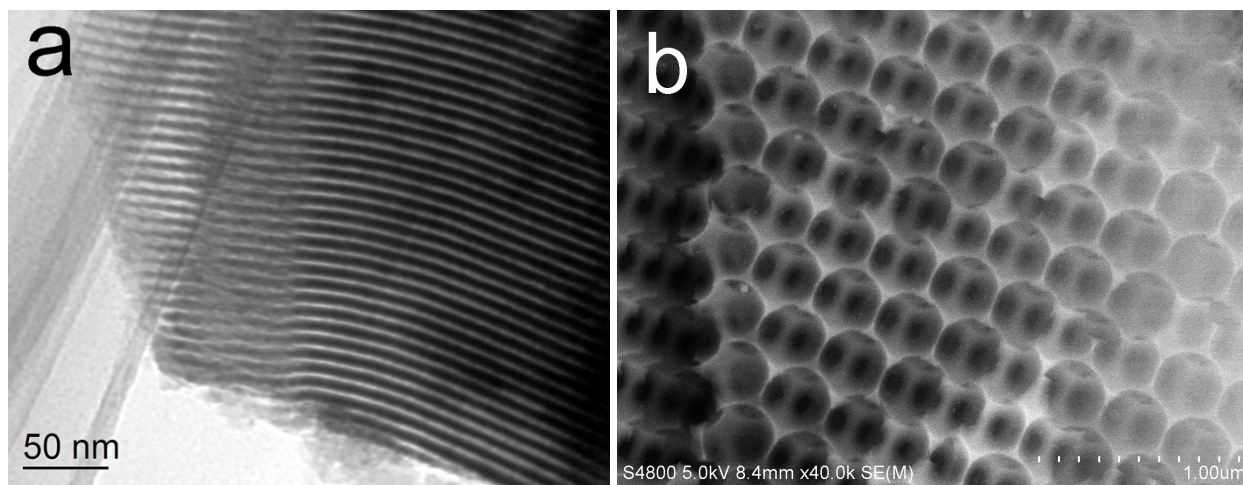

Fig. S2 (a) TEM image of m-HPW/SiO<sub>2</sub>-20 sample and (b) SEM image of M-HPW/SiO<sub>2</sub>-20 sample.

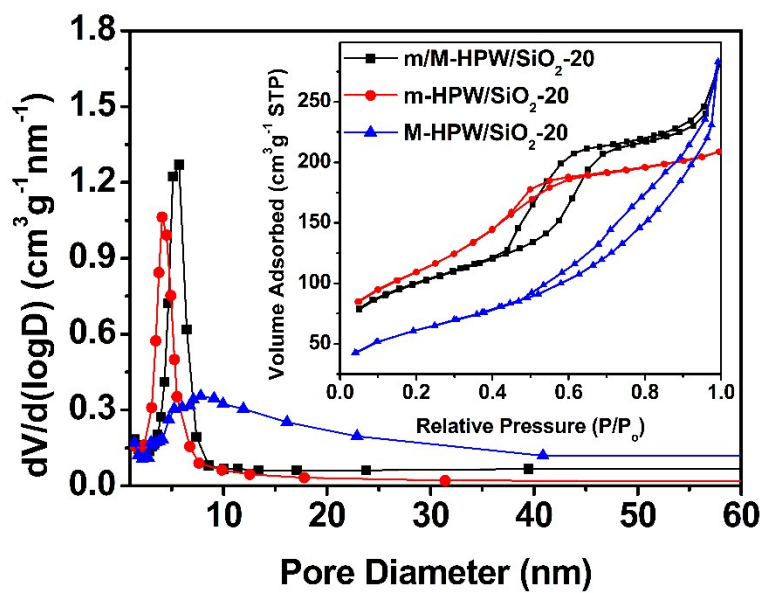

Fig. S3 Nitrogen adsorption/desorption isotherms (inset) and corresponding BJH pore size distribution curves of m/M-HPW/SiO<sub>2</sub>-20, M-HPW/SiO<sub>2</sub>-20 and m-HPW/SiO<sub>2</sub>-20 samples
